# Supplementary material for: Antimicrobial properties of ethoxyether-functionalized imidazolium salts
Source: Royal Society of Chemistry journal article supplement (doi:10.1039/c1sm05759f), 2011-01-01
Supplement: c1sm05759f.pdf [file c1sm05759f.pdf]

## Electronic Supporting Information

### Antimicrobial Properties of Ethoxyether Functionalized Imidazolium Salts

Roy T. W. Huang,<sup>a</sup> K. C. Peng,<sup>\*b</sup> H. N. Shih,<sup>b</sup> G. H. Lin,<sup>\*c</sup> T. F. Chang,<sup>c</sup> S. J. Hsu,<sup>a</sup>  
Tina S. T. Hsu<sup>a</sup> and Ivan J. B. Lin<sup>\*a</sup>

Tel: +886-3-863-3599

Fax: +886-3-863-3570

\*Corresponding Author Email: [ijblin@mail.ndhu.edu.tw](mailto:ijblin@mail.ndhu.edu.tw)

---

<sup>a</sup>Department of Chemistry, National Dong Hwa University, Shoufeng, Hualien 974, Taiwan

E-mail : [ijblin@mail.ndhu.edu.tw](mailto:ijblin@mail.ndhu.edu.tw); Fax : +886-3-863-3570

<sup>b</sup>Institute of Biotechnology, National Dong Hwa University, Shoufeng, Hualien, 974, Taiwan

E-mail : [kcpeng@mail.ndhu.edu.tw](mailto:kcpeng@mail.ndhu.edu.tw)

<sup>c</sup>Institute of Microbiology, Immunology and Biochemistry, Tzu-Chi University, Hualien 970, Taiwan

E-mail : [veronica@mail.tcu.edu.tw](mailto:veronica@mail.tcu.edu.tw)

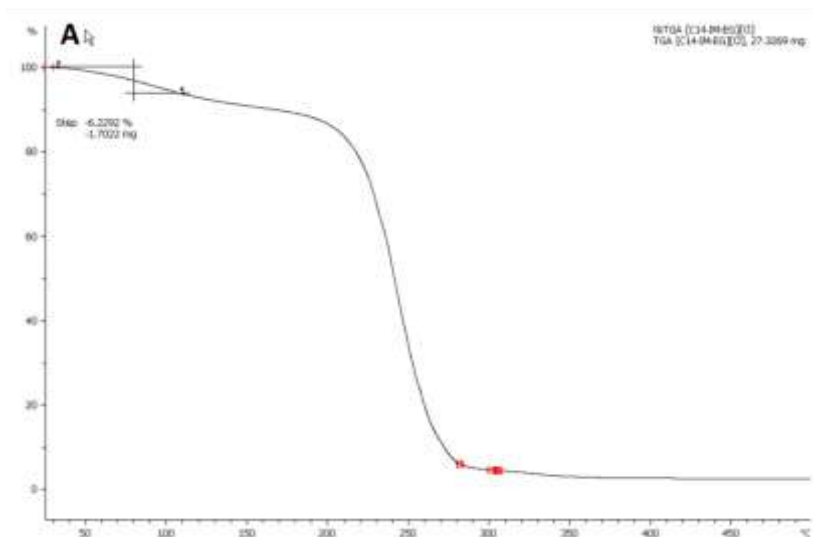

$$27.03(1.5\text{H}_2\text{O})/460.10([\text{C}_{14}\text{-IM-3OEG}][\text{Cl}] \cdot 1.5 \text{H}_2\text{O}) = 5.87\%$$

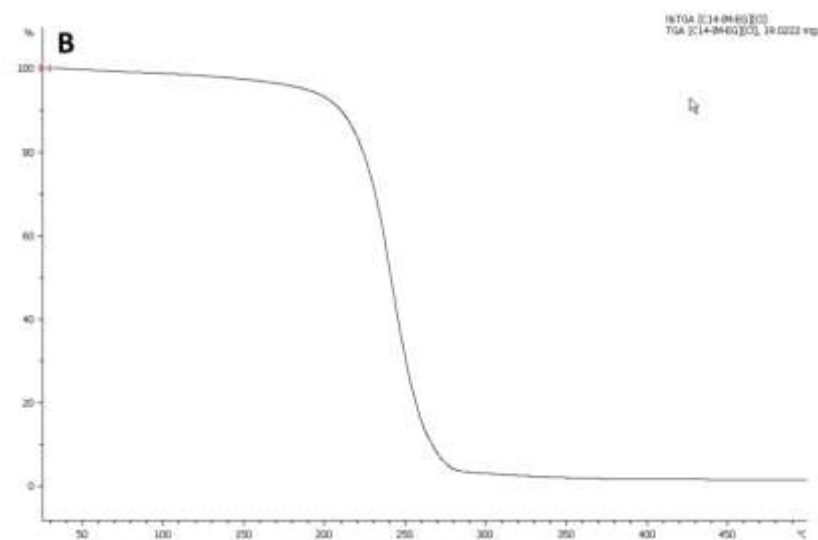

**Figure S1.** TGA diagram of [C<sub>14</sub>-Im-3OEG][Cl] (A)with 1.5H<sub>2</sub>O (B)remove H<sub>2</sub>O

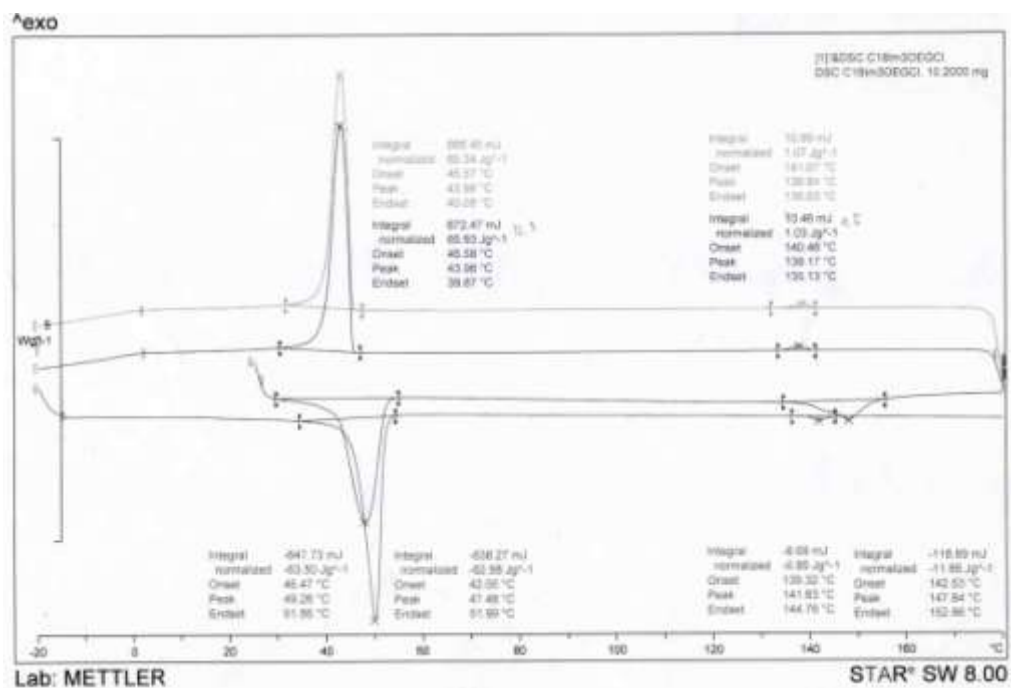

**Figure S2.** DSC diagram of [C<sub>18</sub>-Im-3OEG][Cl]

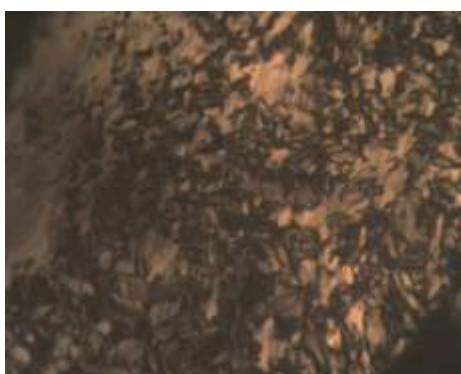

**Figure S3.** Optical micrographs of 80 wt% [C<sub>14</sub>-Im-3OEG][Cl] in water between  
Crossed polarizing filters
